# Supplementary material
Source: PubMed Central journal article supplement (PMC5437932)

Supplemental Figure 1

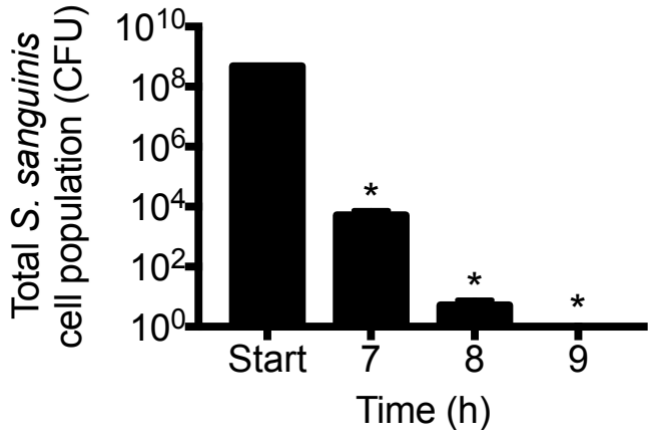

Supplement: ismej2016200x1.pdf [file ismej2016200x1.pdf]

## Supplemental Figure 2

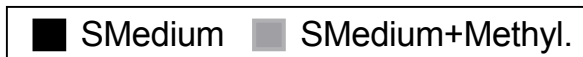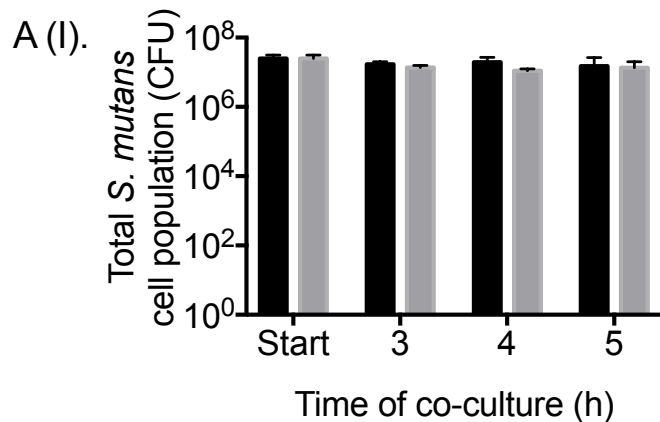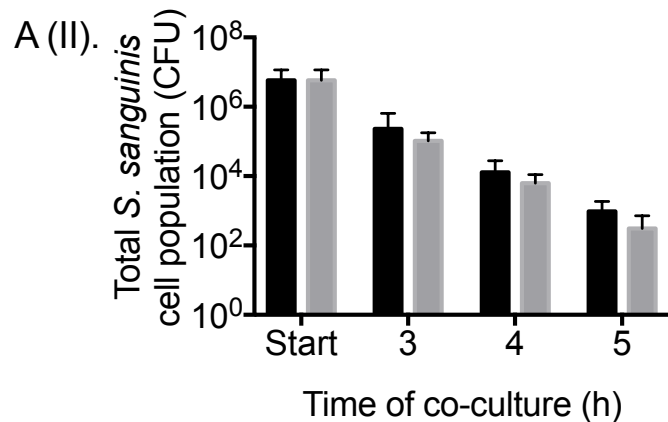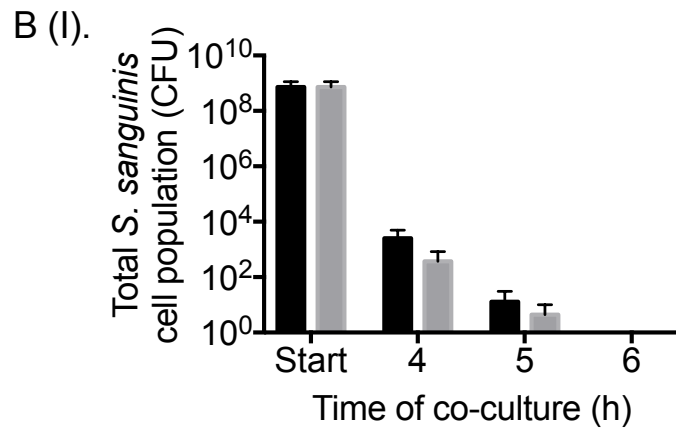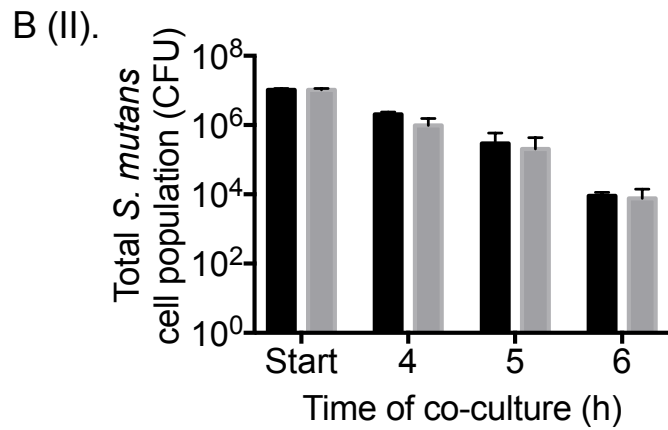

Supplement: ismej2016200x2.pdf [file ismej2016200x2.pdf]
